# Supplementary material for: Investigation of the phase transition to the Ruddlesden–Popper phase in La- or Nb-doped Sr 2 Fe 1.5 Mo 0.5 O 6− δ double perovskites and the impact of lanthanum or niobium doping
Source: Royal Society of Chemistry journal article supplement (doi:10.1039/d5nr00596e), 2025-01-01
Supplement: d5nr00596e1.pdf [file d5nr00596e1.pdf]

## *Supplementary materials for:*

### Investigation of the phase transition to the Ruddlesden-Popper phase in La- or Nb-doped $\text{Sr}_2\text{Fe}_{1.5}\text{Mo}_{0.5}\text{O}_{6-\delta}$ double perovskites. Impact of lanthanum or niobium doping

Agata Ducka<sup>(a)\*</sup>, Patryk Błaszczak<sup>(a,b)</sup>, Marcin Zając<sup>(c)</sup>, Alexey Maximenko<sup>(c)</sup>, Maria Gazda<sup>(a)</sup>, Beata Bochentyn<sup>(a)</sup>

<sup>(a)</sup> Faculty of Applied Physics and Mathematics, Gdansk University of Technology, ul. Narutowicza 11/12, 80-233 Gdańsk, Poland

<sup>(b)</sup> Faculty of Electrical and Control Engineering, Gdansk University of Technology, ul. Narutowicza 11/12, 80-233 Gdańsk, Poland

<sup>(c)</sup> National Synchrotron Radiation Centre SOLARIS, Jagiellonian University, Czerwone Maki 98, 30-392 Kraków, Poland

\*Corresponding author: [agata.ducka@pg.edu.pl](mailto:agata.ducka@pg.edu.pl)

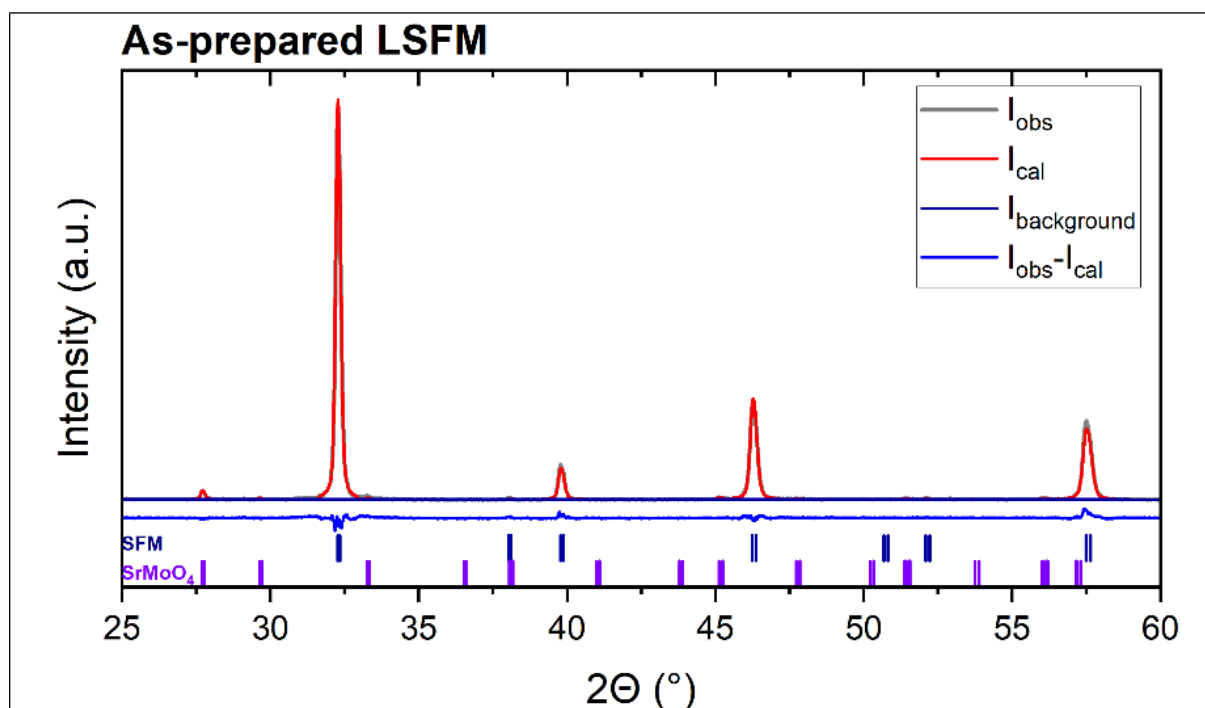

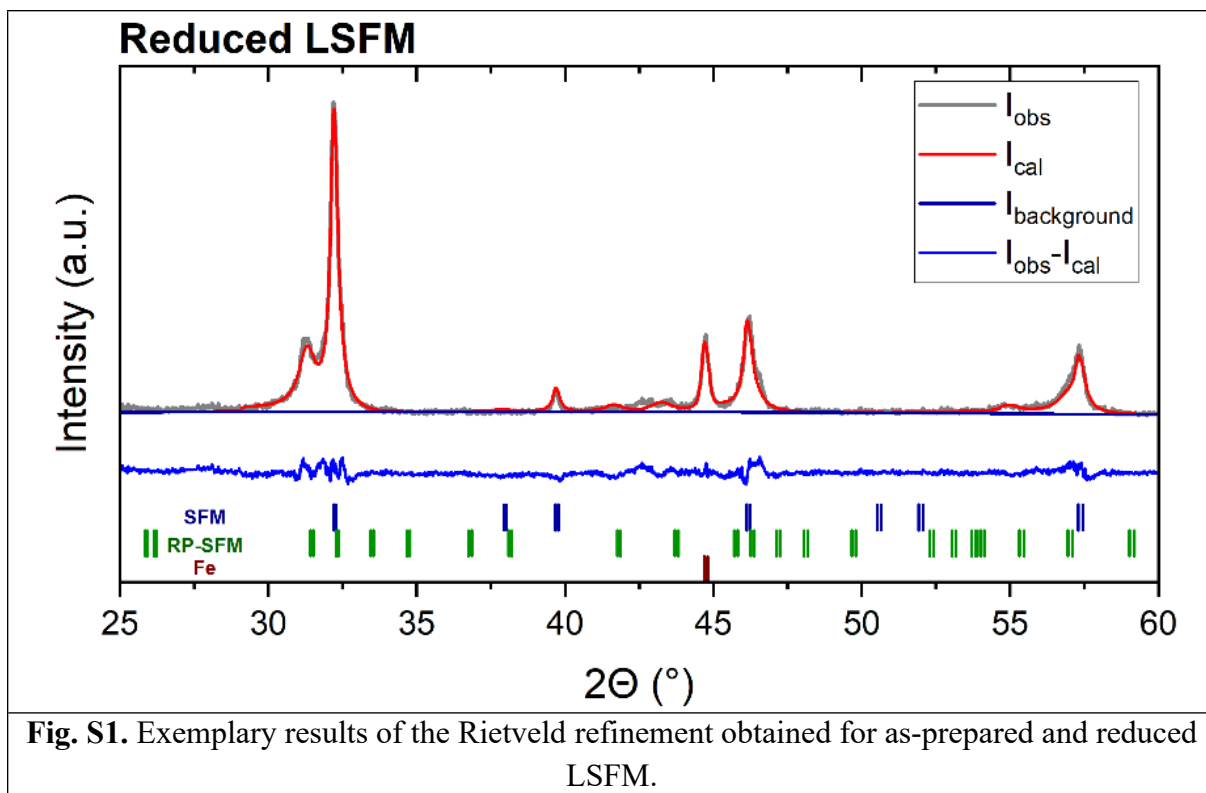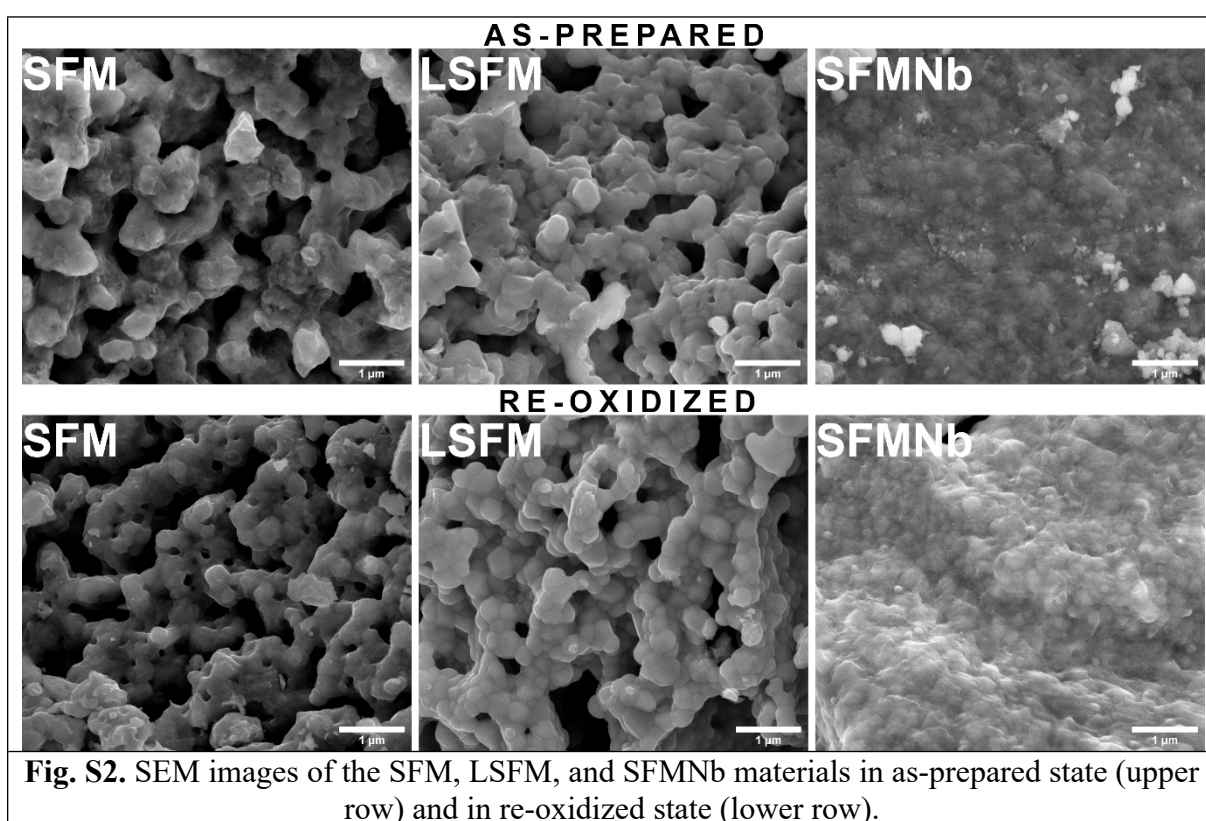

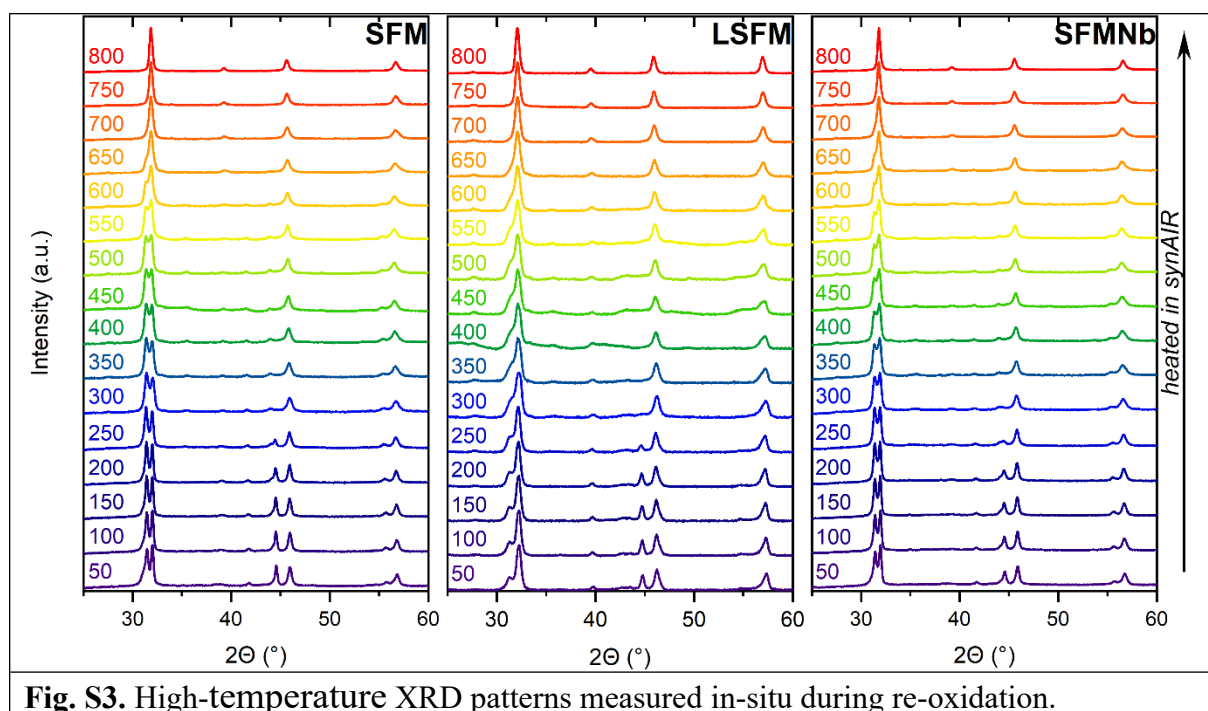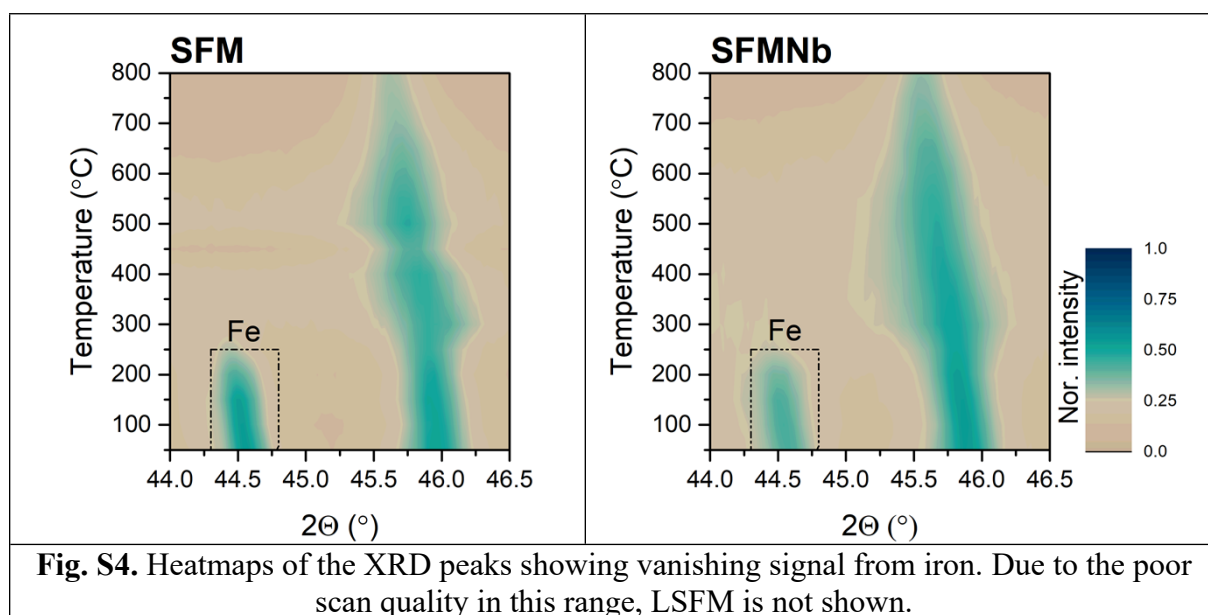

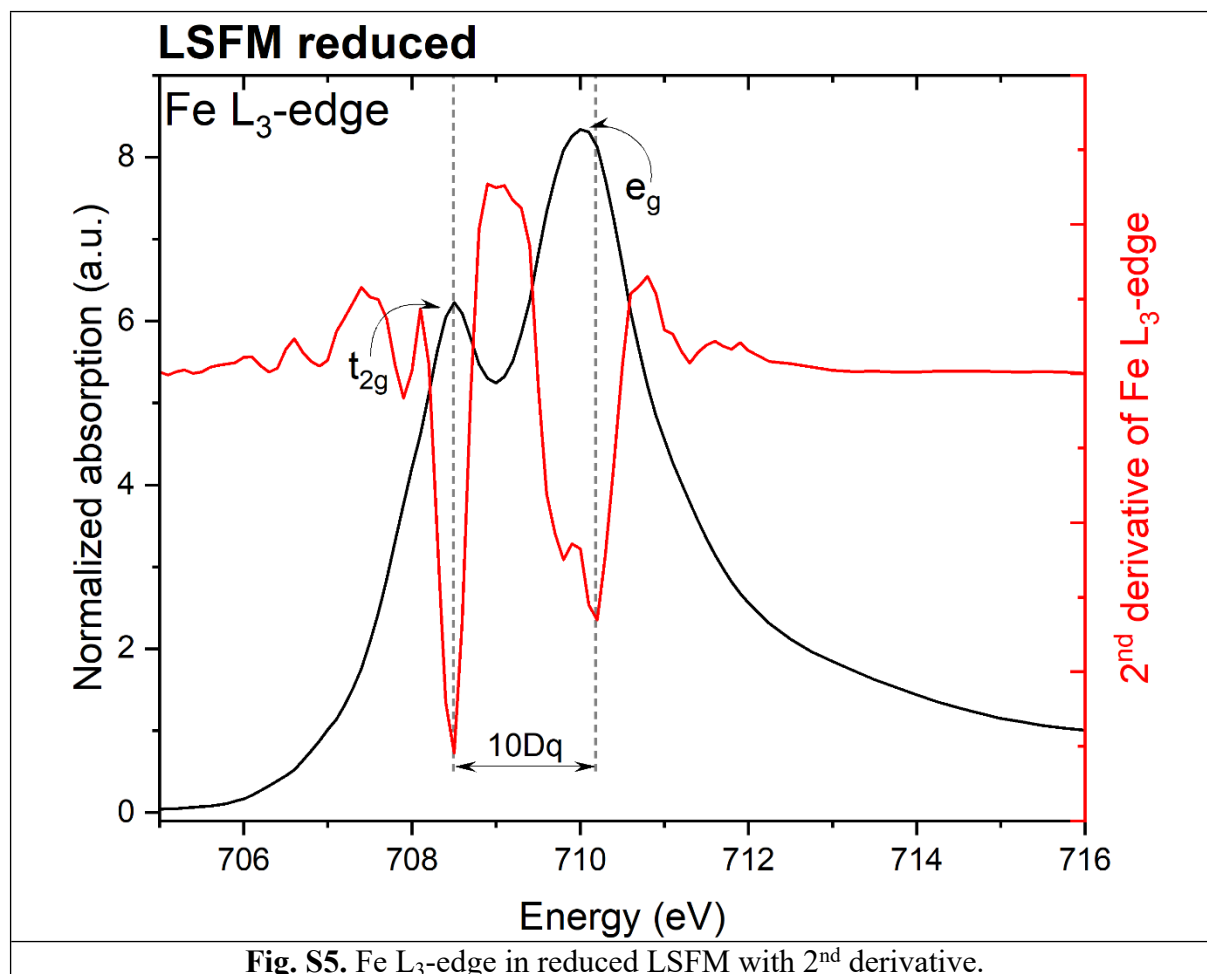

**Fig. S5.** Fe L<sub>3</sub>-edge in reduced LSFM with 2<sup>nd</sup> derivative.

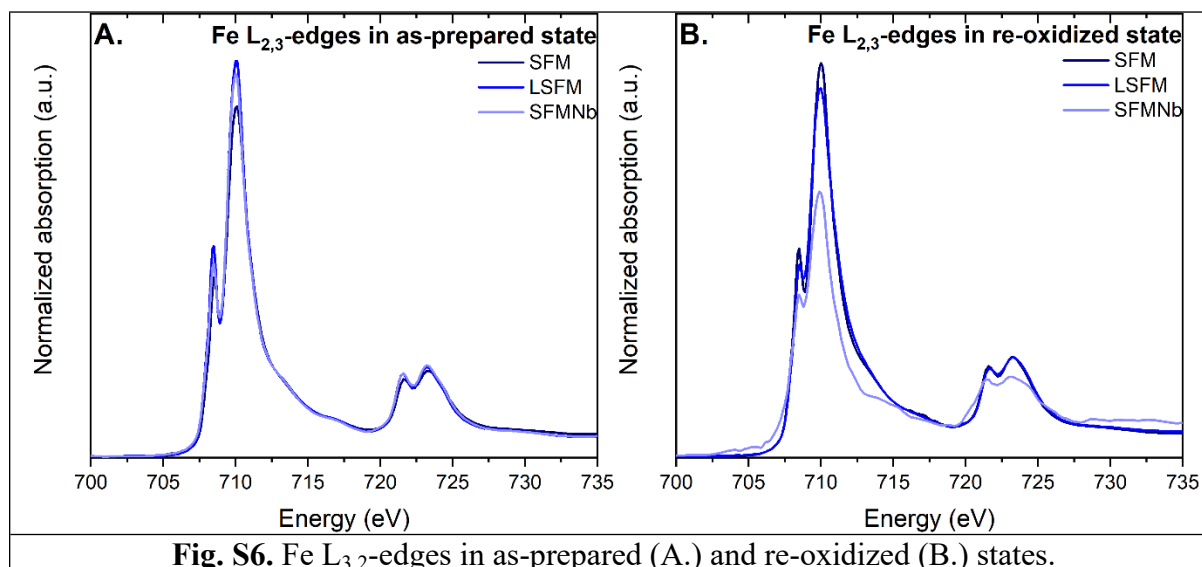

**Fig. S6.** Fe L<sub>2,3</sub>-edges in as-prepared (A.) and re-oxidized (B.) states.

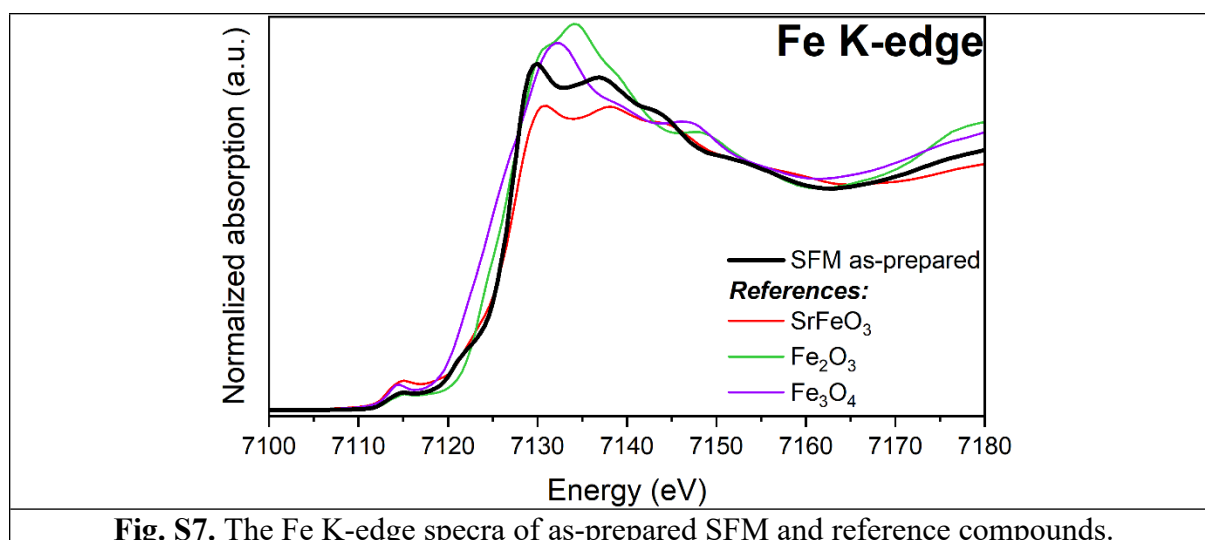

**Fig. S7.** The Fe K-edge spectra of as-prepared SFM and reference compounds.
